# Supplementary material
Source: PubMed Central journal article supplement (PMC3366429)

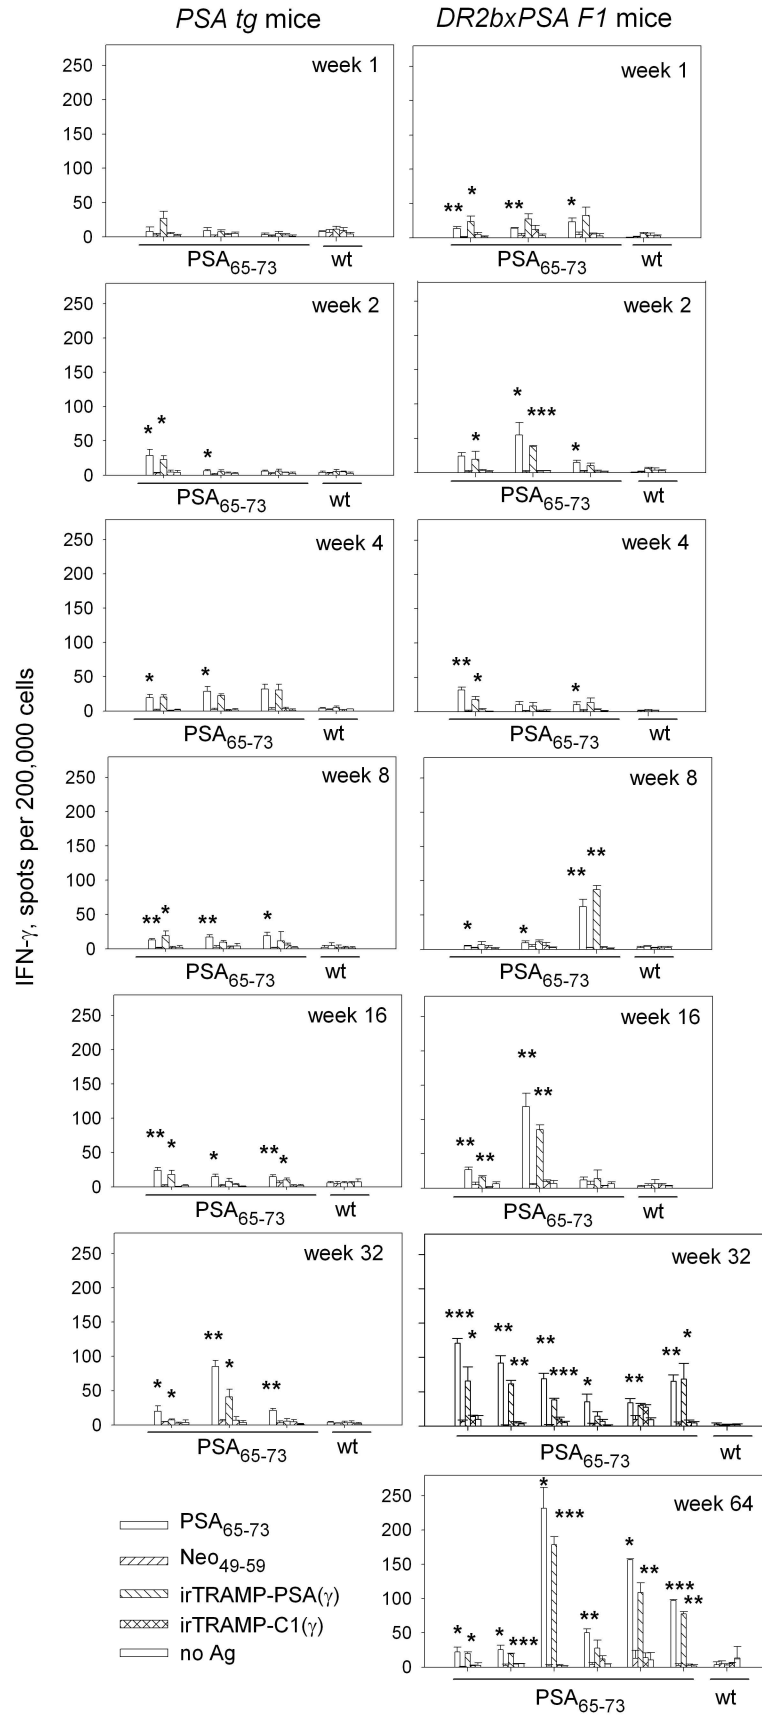

Supplement: NIHMS375001-supplement-2.pdf [file NIHMS375001-supplement-2.pdf]

Supplemental Figure 2.

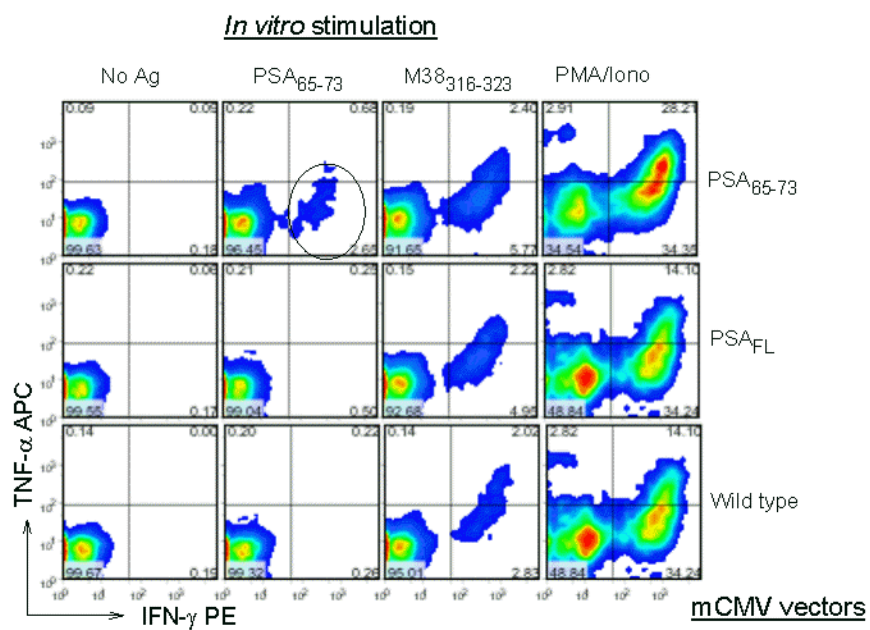

Supplement: NIHMS375001-supplement-3.pdf [file NIHMS375001-supplement-3.pdf]
